# Supplementary material for: Transient non-Hermitian skin effect
Source: PubMed Central journal article supplement (PMC9744917; doi:10.1038/s41467-022-35448-2), 2022-12-12
Supplement: 41467_2022_35448_MOESM3_ESM.pdf [file 41467_2022_35448_MOESM3_ESM.pdf]

## **Description of Additional Supplementary Files**

**Supplementary movie 1:** Movie for acoustic field evolution of left-moving case.

**Supplementary movie 2:** Movie for acoustic field evolution of right-moving case.
